# Supplementary material for: Antibacterial activity of two-dimensional MoS2 sheets
Source: Royal Society of Chemistry journal article supplement (doi:10.1039/c4nr01965b), 2014-01-01
Supplement: c4nr01965b1.pdf [file c4nr01965b1.pdf]

## Supporting Information

### Antibacterial Activity of Two-Dimensional MoS<sub>2</sub> Sheets

*Xi Yang, Jie Li, Tao Liang, Chunyan Ma, Yingying Zhang, Hongzheng Chen,\* Nobutaka Hanagata,\* Huanxing Su,\* and Mingsheng Xu\**

#### 1. Superoxide radical anion production by MoS<sub>2</sub> materials

The possibility of superoxide radical anion ( $O_2^{\bullet-}$ ) production was evaluated by monitoring the absorption of XTT (2, 3-bis (2-methoxy-4-nitro-5-sulfophenyl)-2H-tetrazolium-5-carboxanilide, Fluka). XTT can be reduced by superoxide radical anion ( $O_2^{\bullet-}$ ) to form water-soluble XTT-formazan with the maximum absorption at 470 nm.

XTT (0.4 mM) was dissolved in phosphate buffered saline (PBS) solution at pH 7.0. dispersions of MoS<sub>2</sub> materials (80 µg/mL, 1 mL) in a PBS buffer (80 µg/mL) was mixed with 1 mL of 0.4 mM XTT. The mixtures were incubated in dark for 2 h - 6 h under shaking. Afterwards, the mixture was filtered through a 0.2 µm surfactant-free cellulose acetate membrane filter (Thermo Scientific Nalgene Syringe Filter) to remove the MoS<sub>2</sub> materials. Filtered solution (250 µL) was then placed in a 96-well plate. The change in absorbance at 470 nm was monitored on a microplate spectrophotometer (MTP-880, Corona Electric Co. Ltd. Japan). TiO<sub>2</sub> nanoparticle (40 µg/mL) dispersion was exposed to a UV light source as a positive control.

#### 2. Glutathione (γ-L-glutamyl-L-cysteinyl-glycine, GSH) oxidation examination by Ellman's assay

Dispersion (225 µL) of MoS<sub>2</sub> materials with concentrations of 20 µg/mL, 40 µg/mL or 80

$\mu\text{g/mL}$  in 50 mM bicarbonate buffer (pH 8.6) was added into 225  $\mu\text{L}$  of GSH (0.8 mM in the bicarbonate buffer) to initiate oxidation in microcentrifuge tube. The mixture of  $\text{MoS}_2$  materials with GSH in the tube was covered with alumina foil to prevent illumination of light, and then placed in a shaker with a speed of 150 rpm at room temperature for incubation of 2 h, 4 h, or 6 h. After the incubation, 785  $\mu\text{L}$  of 0.05 M Tris-HCl and 15  $\mu\text{L}$  of 100 mM DNTB (Ellman's reagent, 5,5'-dithio-*bis*-(2-nitrobenzoic acid) (DTNB, Invitrogen or Sigma-Aldrich) were added into the mixture.  $\text{MoS}_2$  materials were removed from the mixture by filtration through a 0.2  $\mu\text{m}$  surfactant-free cellulose acetate membrane filter (Thermo Scientific Nalgene Syringe Filter). A 250  $\mu\text{L}$  aliquot of the filtered solution was then placed in a 96-well plate. Their absorbance at 412 nm was measured on a microplate spectrophotometer (MTP-880, Corona Electric Co. Ltd. Japan). GSH solution without  $\text{MoS}_2$  materials was used as a negative control. GSH (0.4 mM) oxidation by  $\text{H}_2\text{O}_2$  (1 mM) was used as a positive control. The experiments were performed in triplicate.

**Table S1.** Raman peaks of raw  $\text{MoS}_2$  power, ce- $\text{MoS}_2$  sheets, and aggregated ce- $\text{MoS}_2$ .

|                                                    |       |       |       |       |       | $\text{E}_{2g}^1$ | $\text{A}_{1g}$ | 2LA (M) |            | $2\text{E}_{1g}$ | $2\text{E}_{1g}$ (I) | $\text{E}_{2g}^1 + \text{LA}$ (M) | $2\text{E}_{2g}^1$ |       |       |        |        |        |
|----------------------------------------------------|-------|-------|-------|-------|-------|-------------------|-----------------|---------|------------|------------------|----------------------|-----------------------------------|--------------------|-------|-------|--------|--------|--------|
| raw $\text{MoS}_2$ powder ( $\text{cm}^{-1}$ )     | 148.5 | 188.0 |       | 285.5 |       | 382.0             | 407.5           | 451.5   |            | 567.5            |                      | 594.5                             | 751.5              | 776.5 |       |        |        |        |
| ce- $\text{MoS}_2$ sheet ( $\text{cm}^{-1}$ )      | 150.5 | 183.5 | 223.5 | 283.5 | 327.0 | 381.0             | 406.0           | 451.0   | 520.5 (Si) | 566.5            | 573.5                | 593.5                             | 748.5              | 778.0 | 784.5 | 813.82 | 1566.5 |        |
| aggregated ce- $\text{MoS}_2$ ( $\text{cm}^{-1}$ ) | 148.5 | 183.0 | 223.5 | 283.5 |       | 377.5             | 403.0           | 445.5   |            | 563.5            | 583.5                | 616.5                             | 746.0              | 777.5 |       | 814.0  | 1350.5 | 1384.5 |

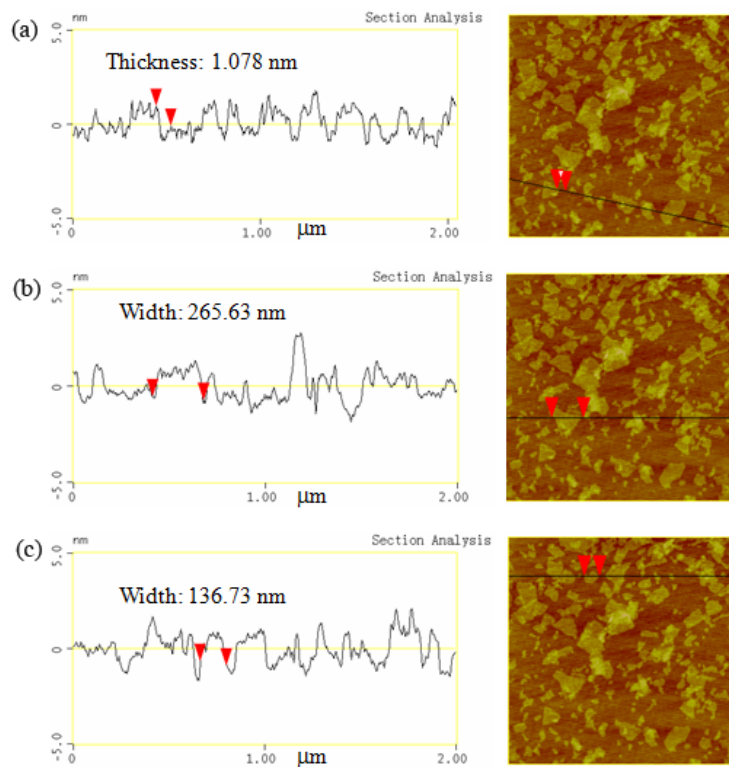

**Figure S1. AFM characterization of ce-MoS<sub>2</sub> sheets.** (a) A cross-sectional profile of a ce-MoS<sub>2</sub> sheet suggests that the ce-MoS<sub>2</sub> sheets are monolayers; (b) A cross-sectional profile of a ce-MoS<sub>2</sub> sheet suggests that the size of the ce-MoS<sub>2</sub> sheet is 265.63 nm; (c) A cross-sectional profile of a ce-MoS<sub>2</sub> sheet suggests that the size of the ce-MoS<sub>2</sub> sheet is 163.73 nm.

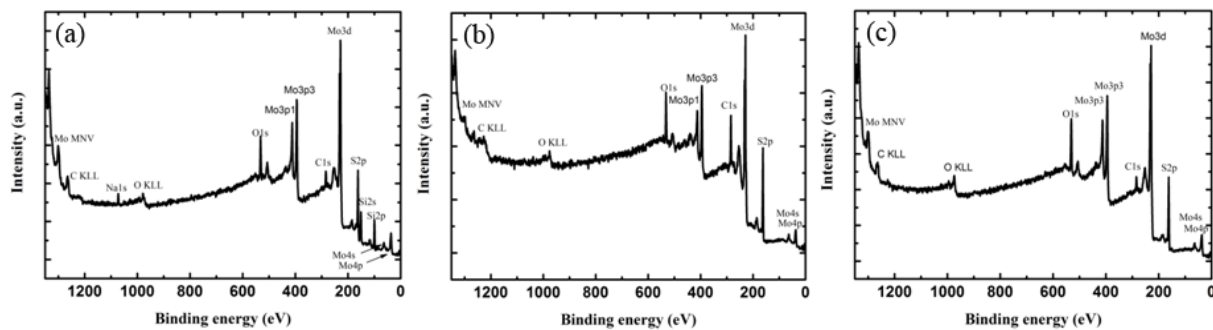

**Figure S2.** XPS patterns of (a) ce-MoS<sub>2</sub> sheets on Si/SiO<sub>2</sub> substrate; (b) Raw MoS<sub>2</sub> powers on Si/SiO<sub>2</sub> substrate; (c) Aggregated ce-MoS<sub>2</sub> on Si/SiO<sub>2</sub> substrate. The results suggest that the MoS<sub>2</sub> materials are highly pure.

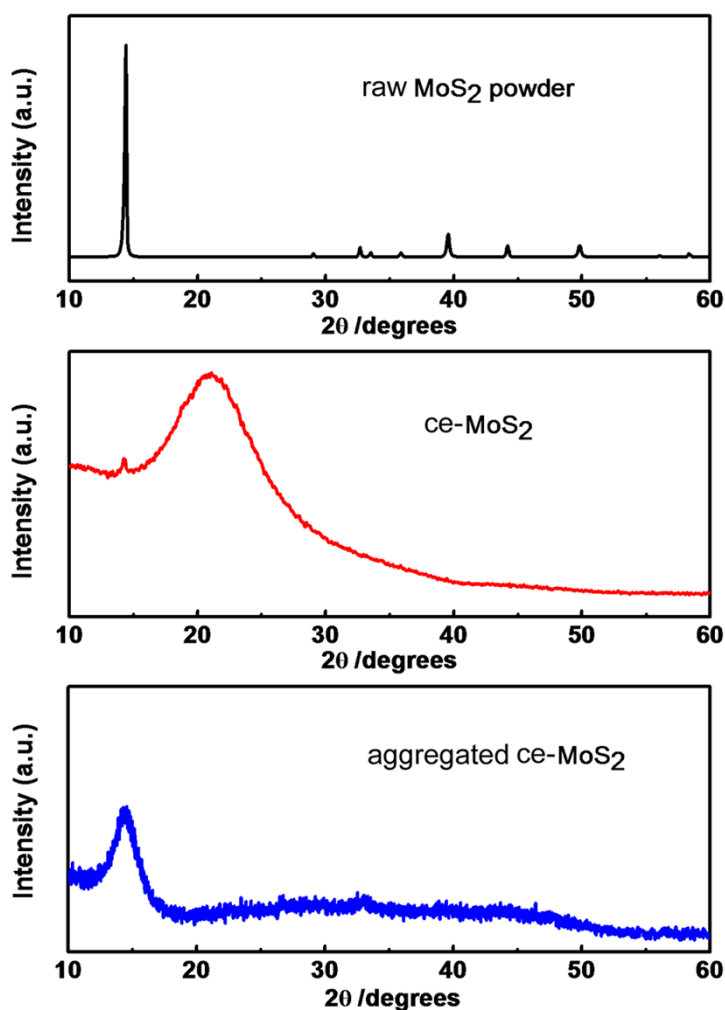

**Figure S3.** X-ray diffraction (XRD) spectra of raw MoS<sub>2</sub> powder, ce-MoS<sub>2</sub>, and aggregated ce-MoS<sub>2</sub>. Compared to the XRD patterns for the raw MoS<sub>2</sub> powder, almost all the peaks disappeared for the ce-MoS<sub>2</sub> sheets and the (002) peak at  $2\theta=14.4^\circ$  became very weak, which is mostly due to the crystals with nanoscale sizes and the fact that the ce-MoS<sub>2</sub> sheets lay on the substrate with preferred orientation (Hua Zhang, et al., *Angew. Chem. Int. Ed.*, 2011, 50, 11093; Manish Chhowalla, et al., *Nano Lett.*, 2011, 11, 5111). However, the (002) peak became observable for the aggregated ce-MoS<sub>2</sub>, suggesting the monolayer MoS<sub>2</sub> restacking together.

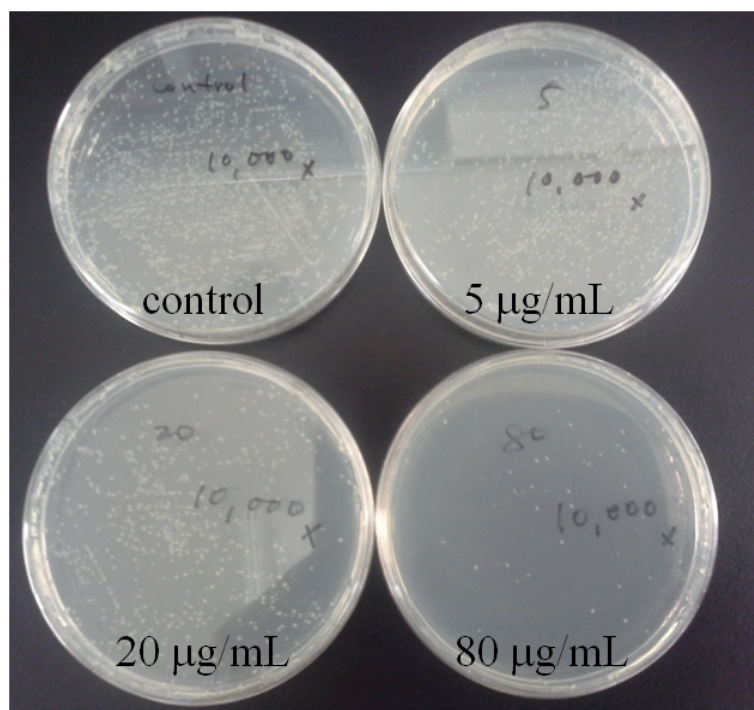

**Figure S4.** Digital camera photos of live *E.coli* DH5 $\alpha$  bacteria after they were exposed to ce-MoS<sub>2</sub> dispersions with different concentrations for 2 h.

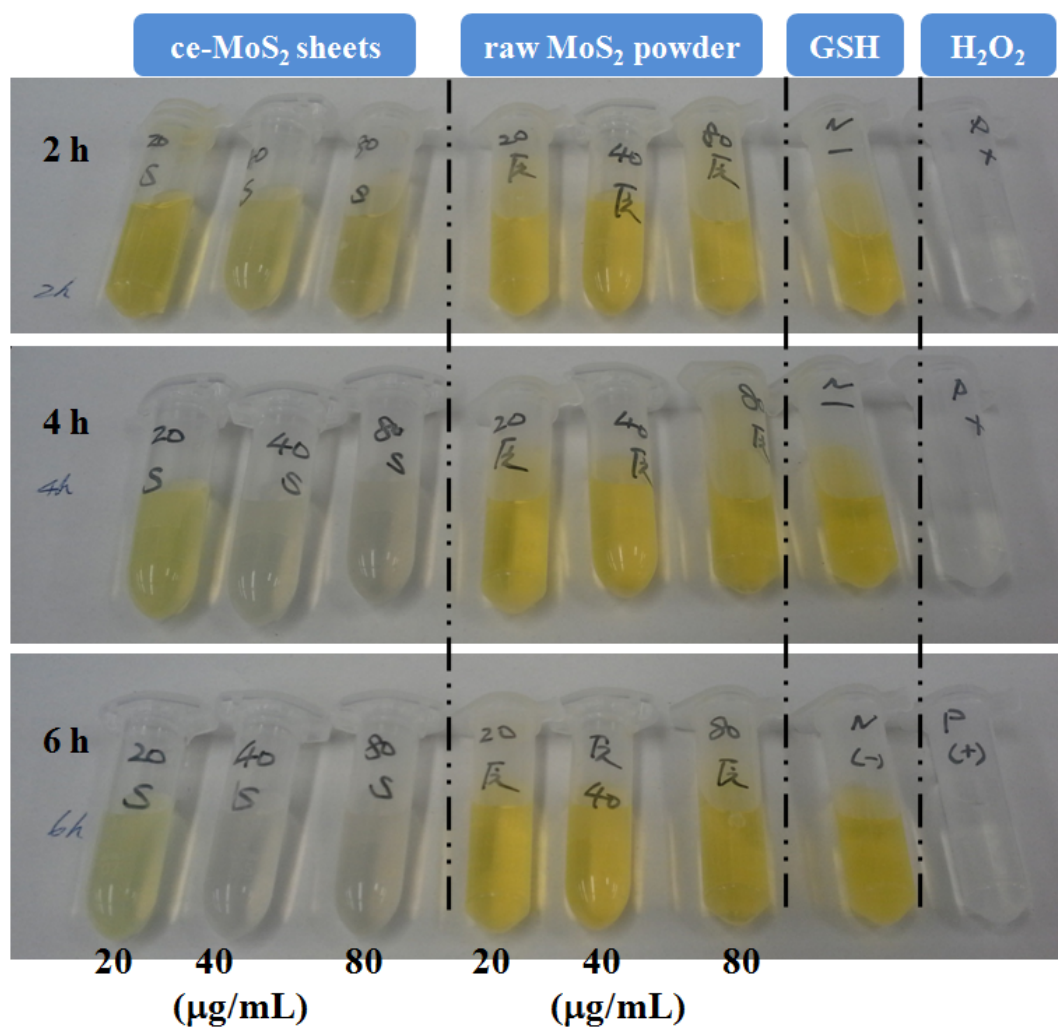

**Figure S5. Glutathione oxidation by monitoring color change.** GSH was mixed with dispersions (20, 40 or 80 µg/mL) of ce-MoS<sub>2</sub> sheets or raw MoS<sub>2</sub> powders for 2 h - 6 h. GSH solution without MoS<sub>2</sub> materials was used as a negative control. GSH (0.4 mM) oxidation by H<sub>2</sub>O<sub>2</sub> (1 mM) was used as a positive control.

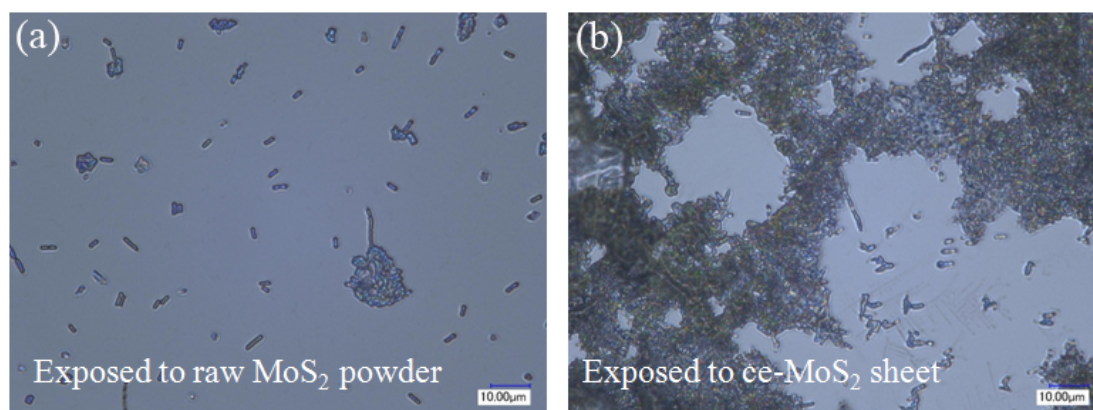

**Figure S6.** Keyence microscope image of the *E.coli* DH5 $\alpha$  cells after exposure to (a) raw MoS<sub>2</sub> powder and (b) ce-MoS<sub>2</sub> sheet for 2 h. We can see after exposed to the ce-MoS<sub>2</sub> sheets, most the cells did not show a normal cell shape as observed on the cells exposed to the raw MoS<sub>2</sub> powders.

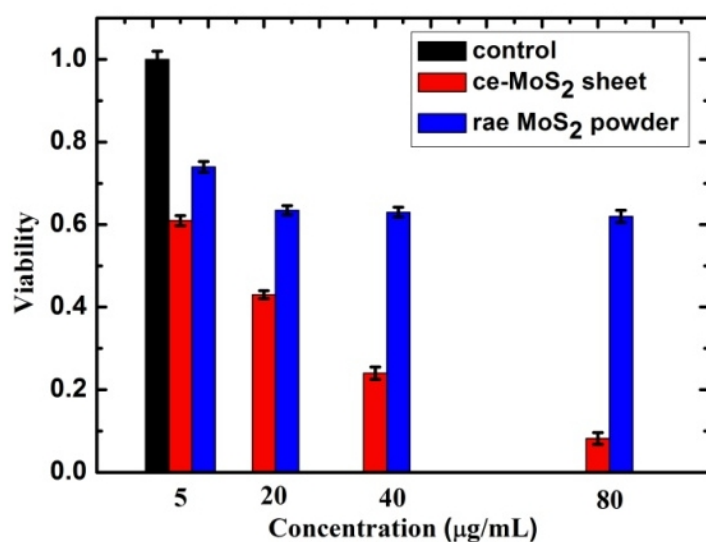

**Figure S7.** Concentration dependent viability of the cells after exposure of 2 h.
